# Supplementary material
Source: PubMed Central journal article supplement (PMC4225625)
Supplement: NIHMS638036-supplement-Supplementary_Data.pdf [file NIHMS638036-supplement-Supplementary_Data.pdf]

### Supplementary Table 1

Diet composition

|                     | Control Diet |                     | High Fat Diet |                     |
|---------------------|--------------|---------------------|---------------|---------------------|
|                     | %kCal        | Source              | %kCal         | Source              |
| <b>Protein</b>      | 20.1         | Casein              | 15.2          | Casein              |
| <b>Carbohydrate</b> | 69.8         | Sucrose/Corn starch | 42.7          | Sucrose/Corn starch |
| <b>Fat</b>          | 10.2         | Lard                | 42            | Anhydrous Milkfat   |
| <b>kCal/g</b>       | 3.7          |                     | 4.5           |                     |

### Supplementary Figure 1

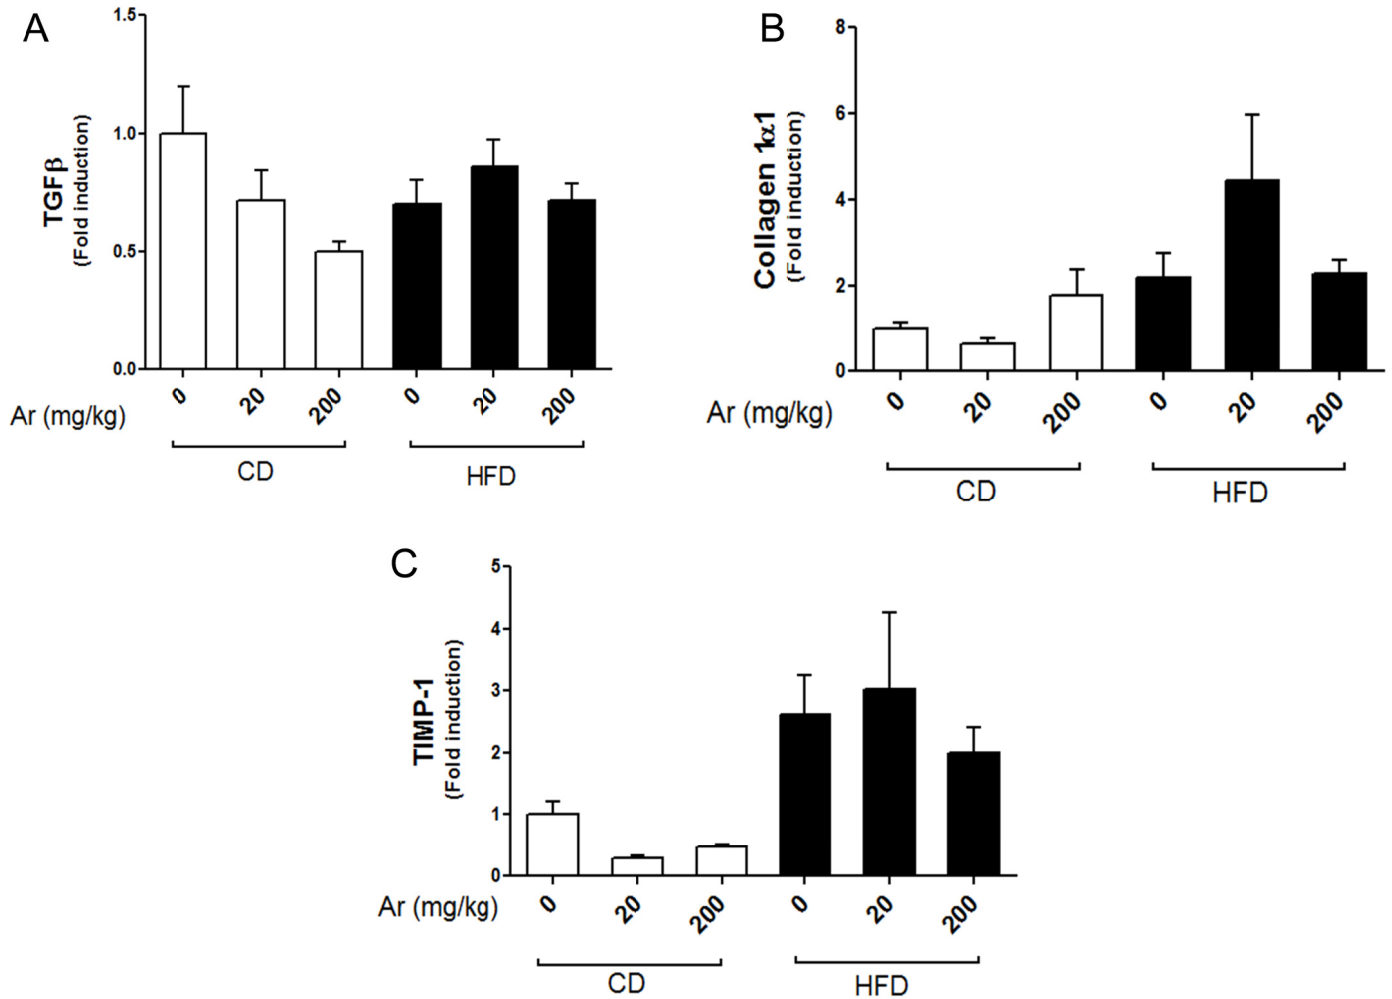

**Effects of Aroclor 1260 exposure on genes involved in fibrosis.** Real-time PCR experiments were performed to measure the hepatic expression of (A) TGFβ (B) Collagen1α1 and (C) TIMP-1, n=10. Values are mean ± SEM. CD-control diet, HFD-high fat diet, Ar-Aroclor 1260.

## Supplementary Figure 2

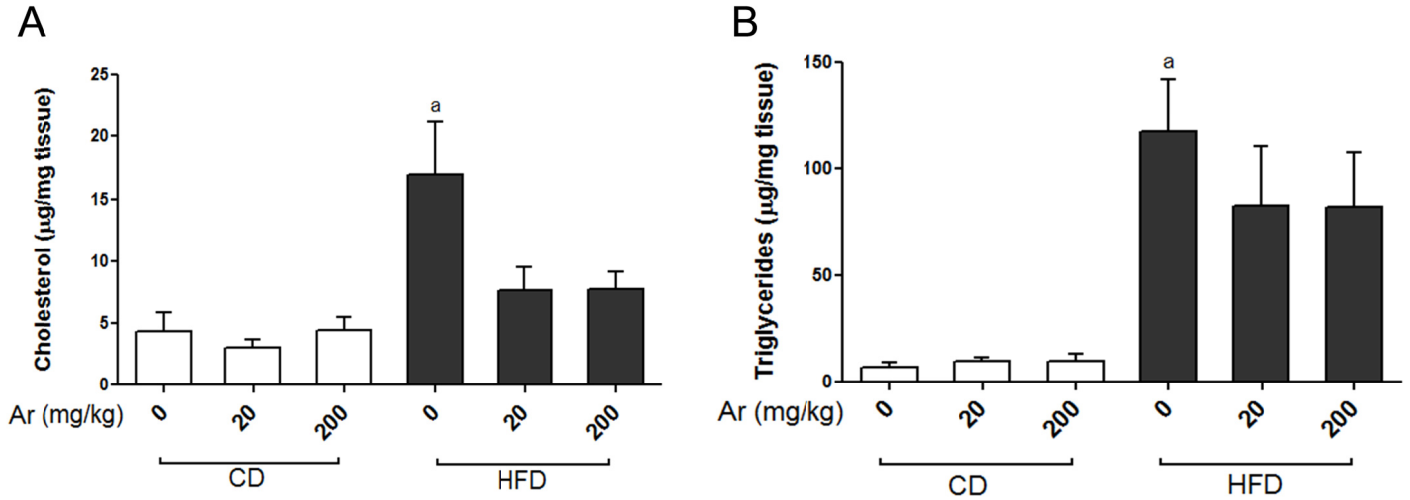

### Effects of Aroclor 1260 exposure on hepatic cholesterol and triglycerides.

Hepatic levels of (A) cholesterol and (B) triglycerides were quantified ( $\mu\text{g}/\text{mg}$  tissue) in mice ( $n=5$ ) fed with CD or HFD with or without Aroclor 1260 co-exposure. Values are mean  $\pm$  SEM,  $p < 0.05$ , a-  $\Delta$  due to HFD, b-  $\Delta$  due to Aroclor 1260 exposure at 20 mg/kg, c-  $\Delta$  due to Aroclor 1260 exposure at 200 mg/kg. CD-control diet, HFD-high fat diet, Ar-Aroclor 1260.

### Supplementary Figure 3

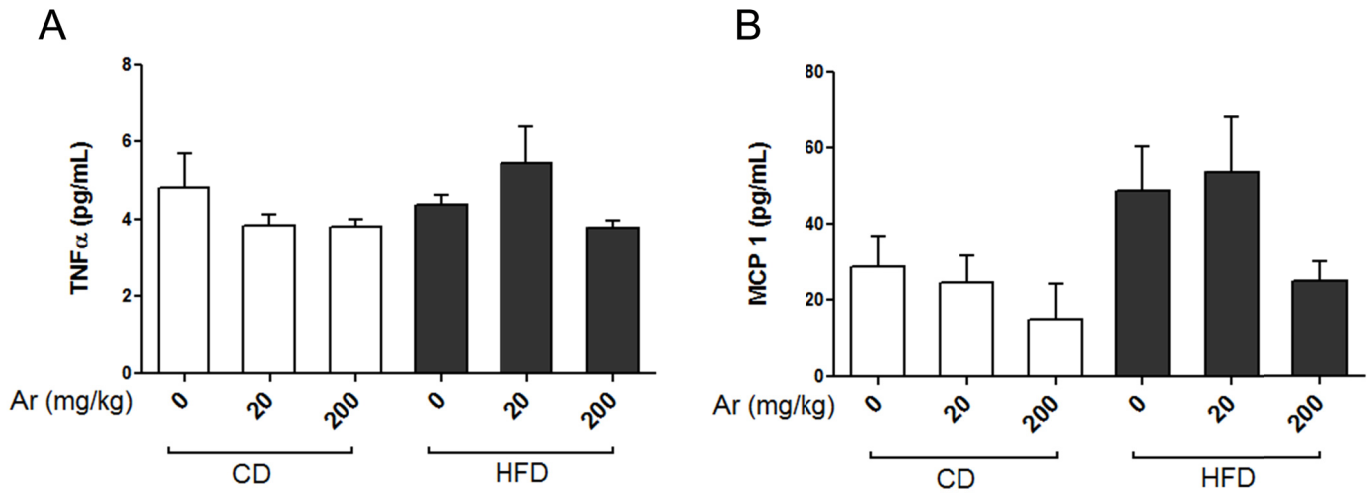

**Effects of Aroclor 1260 exposure on serum cytokines.** Serum levels of (A) TNF $\alpha$  (pg/mL) and (B) MCP1 (pg/mL) were measured using the Luminex IS 100 system, n=10. Values are mean  $\pm$  SEM. CD-control diet, HFD-high fat diet, Ar-Aroclor 1260.

### Supplementary Figure 4

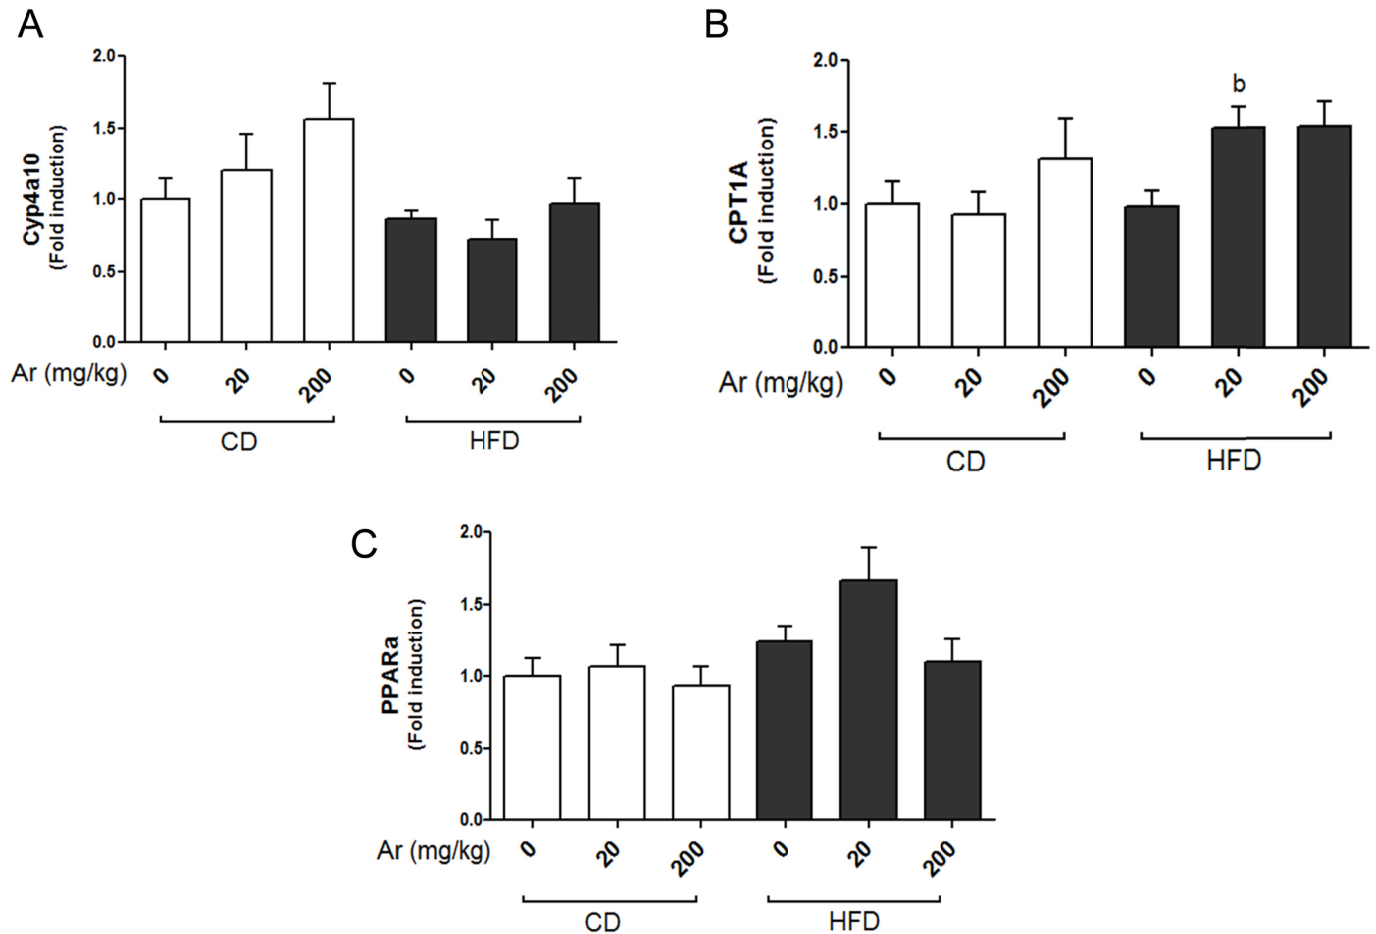

**Effects of Aroclor 1260 exposure on genes involved in lipid metabolism.** Real-time PCR experiments were performed to measure the hepatic expression of (A) Cyp4a10 (B) CPT1A and (C) PPAR $\alpha$ , n=10. Values are mean  $\pm$  SEM. CD-control diet, HFD-high fat diet, Ar-Aroclor 1260.
